# Supplementary material
Source: PubMed Central journal article supplement (PMC2937997)

*Supplemental Material for*

**ATAXIA TELANGIECTASIA MUTATED (ATM)-MEDIATED DNA DAMAGE  
RESPONSE IN OXIDATIVE STRESS-INDUCED VASCULAR ENDOTHELIAL  
CELL SENESCENCE**

**Hong Zhan<sup>‡1</sup>, Toru Suzuki<sup>‡¶1,2</sup>, Kenichi Aizawa<sup>‡¶1</sup>, Kiyoshi Miyagawa<sup>§</sup>, and Ryozo Nagai<sup>‡3</sup>**

From the Departments of <sup>‡</sup>Cardiovascular Medicine, <sup>¶</sup>Ubiquitous Preventive Medicine,  
and <sup>§</sup>Radiation Biology,

Graduate School of Medicine, The University of Tokyo, 7-3-1 Hongo, Bunkyo, Tokyo 113-8655,  
Japan

<sup>1</sup>These authors contributed equally to this work

Running head: ATM mediates endothelial cell senescence

<sup>2</sup>To whom correspondence may be addressed: Toru Suzuki, Department of Cardiovascular Medicine,  
Graduate School of Medicine, The University of Tokyo, 7-3-1 Hongo, Bunkyo, Tokyo 113-8655,  
Japan. Tel.: 81-3-5800-9846; Fax: 81-3-5800-9847; E-mail: torusuzu-tyk@umin.ac.jp

<sup>3</sup>To whom correspondence may be addressed: Ryozo Nagai, Department of Cardiovascular  
Medicine, Graduate School of Medicine, The University of Tokyo, 7-3-1 Hongo, Bunkyo, Tokyo  
113-8655, Japan. Tel.: 81-3-5800-6526; Fax: 81-3-3815-2087; E-mail: nagai-tyk@umin.ac.jp

## Supplemental Experimental Procedures

### *siRNA*

Small interference RNA (siRNA) constructs were obtained as Silencer Select Validated siRNA from Applied Biosystems/Ambion (CA, USA); Akt siRNA (sense: 5'-GCGUGACCAUGAACGAGUUtt-3'; antisense: 5'-AACUCGUUCAUGGUCACGCgg-3'); p53 siRNA (sense: 5'-GUAUUCUACUGGGACGGAAtt-3'; antisense: 5'-UUCCGUCCCAGUAGAUUACca-3'); p21CIP1 siRNA (sense: 5'-CAAGGAGUCAGACAUUUUAtt -3'; antisense: 5'-UAAAAUGUCUGACUCCUUGtt-3'); and negative control #1 siRNA.

### *Antibodies*

Normal mouse and rabbit IgG antibodies were purchased from Santa Cruz Biotechnology (CA, USA).

## Supplemental Figure Legends

Supplemental Fig. 1. Four higher magnification photographs of representative cells shown in Fig. 1D, 1E, 1F and 1G to better show nuclear foci. *A, B, C & D.* Immunofluorescence analysis for (A) 53BP1 (green), (B) phosphorylated ATM (S1981) (red), (C) total ATM (red) and (D) p21 (red) in etoposide- or H<sub>2</sub>O<sub>2</sub>-treated HUVECs. Hoechst 33258 was used as nuclear stain (blue). Scale bar, 5  $\mu$ m.

Supplemental Fig. 2. Higher magnification photographs of representative cells in Fig. 3A to better show nuclear foci (cells were treated with 100  $\mu$ M H<sub>2</sub>O<sub>2</sub> for 30 min in the absence or presence of NAC or KU-55933). Immunofluorescence analysis of the effects of antioxidant (NAC) and ATM inhibitor (KU55933) on phosphorylated ATM (red). Hoechst 33258 was used as nuclear stain (blue). Scale bar, 5  $\mu$ m.

Supplemental Fig. 3. Immunofluorescence analysis for 53BP1 and  $\gamma$ -H2AX-S139 in H<sub>2</sub>O<sub>2</sub>-treated HUVECs. Hoechst 33258 was used as nuclear stain (blue). Expression of 53BP1 and  $\gamma$ -H2AX-S139 labeled by green fluorescence in HUVECs was significantly increased with nuclear

foci formation after H<sub>2</sub>O<sub>2</sub> treatment. Scale bar, 5 μm.

Supplemental Fig. 4. Effects of silencing (RNAi) of signaling molecules in the Akt/p53/p21 pathway. *A.* Western blot analysis of the effects of siRNA against Akt on expression of total Akt, p53 phosphorylation (S15) and p21 induction. *B.* Western blot analysis of the effects of siRNA against p53 on expression of total p53 and p21 induction. *C.* Western blot analysis of the effects of siRNA against p21 on expression of p21 induction. 1.5x10<sup>5</sup> cells/well were transfected with siRNA against Akt, p53 and p21 for 72h followed by incubation with 100 μM H<sub>2</sub>O<sub>2</sub> for 30 min in (*A, B*) or 3h in (*C*). GAPDH was used as loading control. Values are mean ± s.e.m (n=3). \**P*<0.05 versus cells transfected with the same concentration of negative control siRNA. Representative blots are shown in the left panel while corresponding quantitation is shown in the right panels. Reagent only: cells transfected with Lipofectamine 2000 alone.

Supplemental Fig. 5. Effects of abrogation of gene expression by siRNA against Akt, p53 or p21 in oxidative stress-induced endothelial senescence. *A.* Staining of SA-β-gal activity in cells silenced for Akt, p53 or p21. *B.* Quantitation of percentage of SA-β-gal-positive cells in cells silenced for Akt, p53 or p21. Values are mean ± s.e.m (n=3). \**P*<0.05 versus cells transfected with the same concentration of negative control siRNA (lanes 14, 15 or lane 16, respectively) (n=3 each). Original magnification, ×100. Scale bar, 200 μm. Reagent only: cells transfected with Lipofectamine 2000 alone. Silencing of Akt, p53 or p21 by siRNA suppressed increase in SA-β-gal-positive cells induced by H<sub>2</sub>O<sub>2</sub>.

Supplemental Fig. 6. Immunostaining for von Willebrand factor, p21 or p16 in the thoracic aortas of STZ-diabetic ATM knockout mice. Six respective ATM<sup>+/+</sup> (Wild), ATM<sup>+/-</sup> (Hetero), ATM<sup>-/-</sup> (Homo) mice were used. *A.* Immunostaining for von Willebrand factor, an endothelial cell marker, in the thoracic aortas (brown). Normal rabbit IgG antibody was used as negative control. Arrows indicate positive staining in the endothelium. *B.* Immunostaining for p21 and p16 (brown). Normal mouse IgG antibody was used as negative control. Scale bar, 50 μm, respectively.

Supplemental Fig. 7. *A, B.* Western blot analysis of ATM expression in thoracic aortas (*A*) and kidneys (*B*) of ATM knockout mice (wild-type, and heterozygous- and homozygous-knockout mice, n=3, respectively).

# Supplemental Fig.1

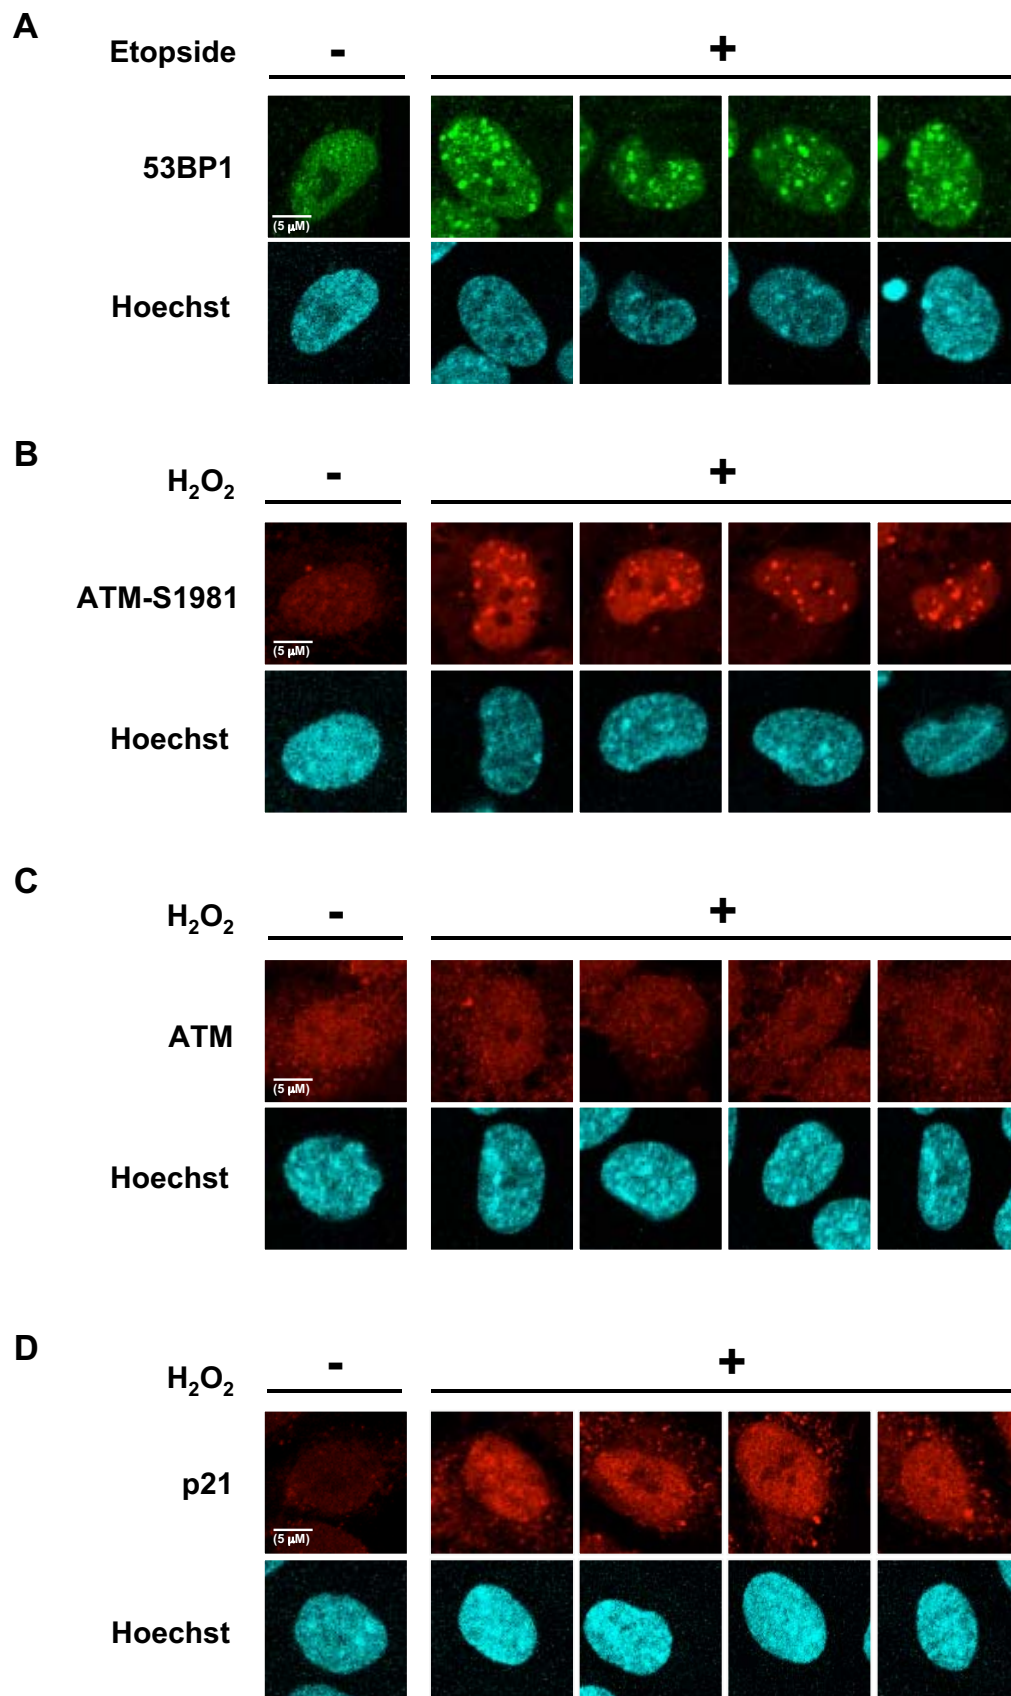



### Supplemental Fig. 3

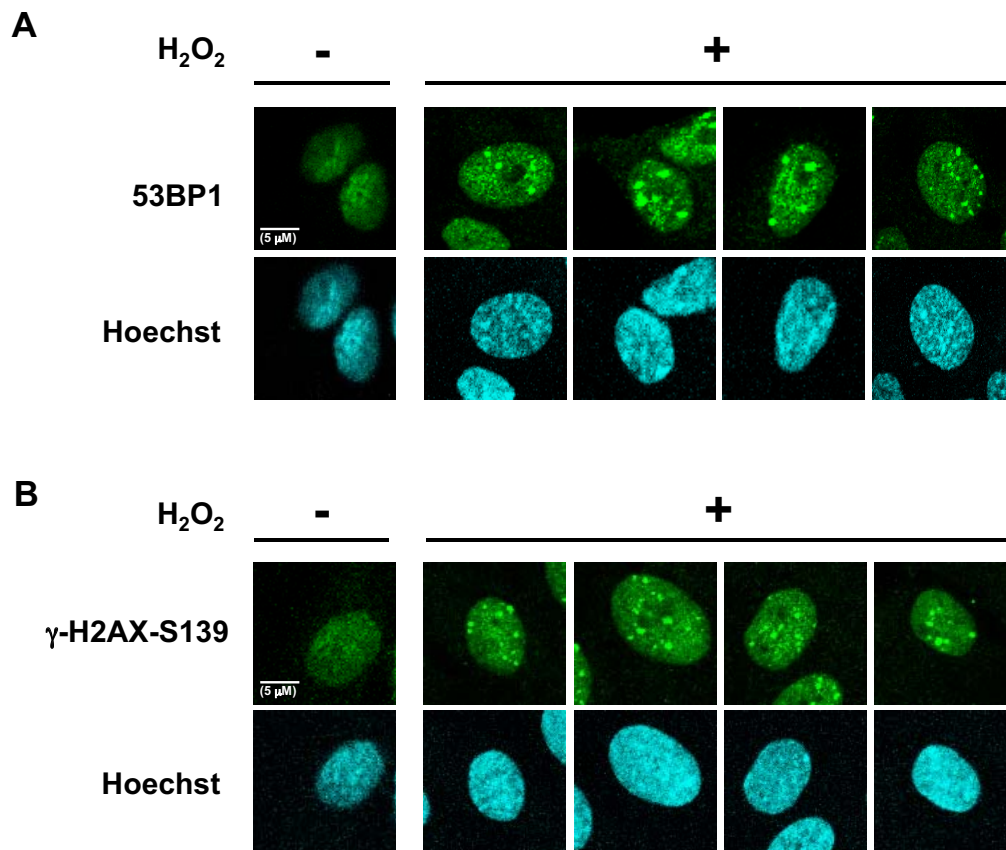

# Supplemental Fig. 4

**A**

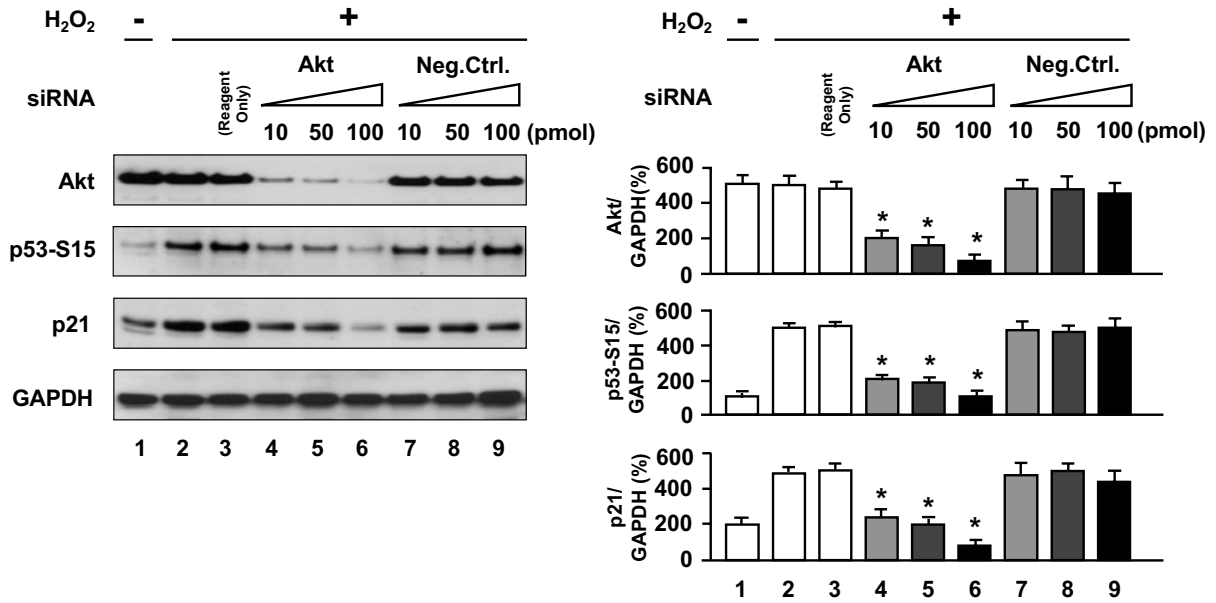

**B**

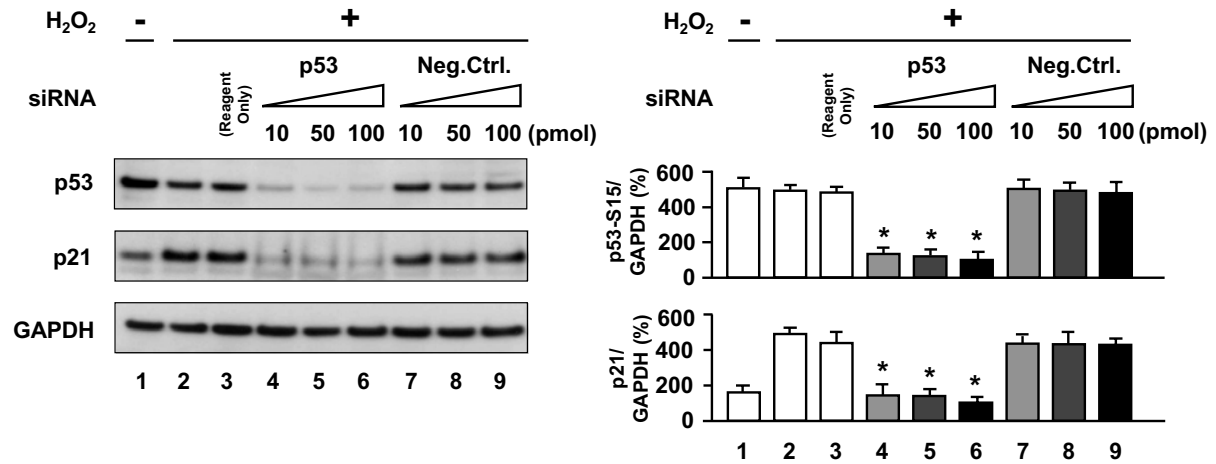

**C**

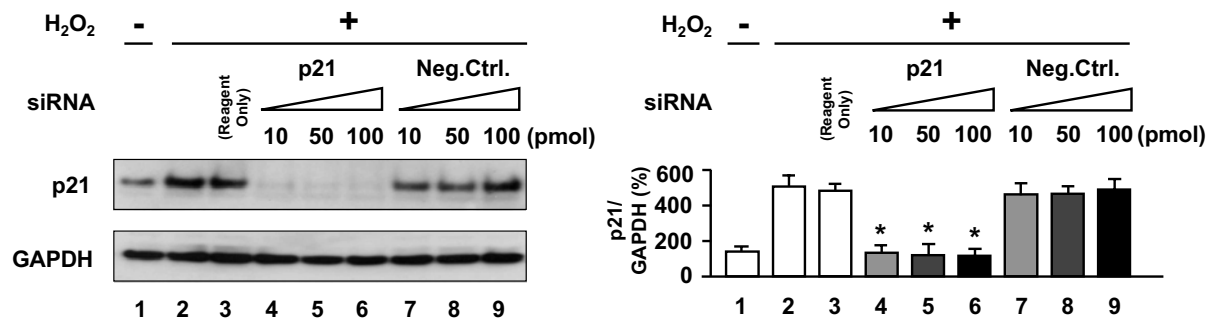

# Supplemental Fig. 5

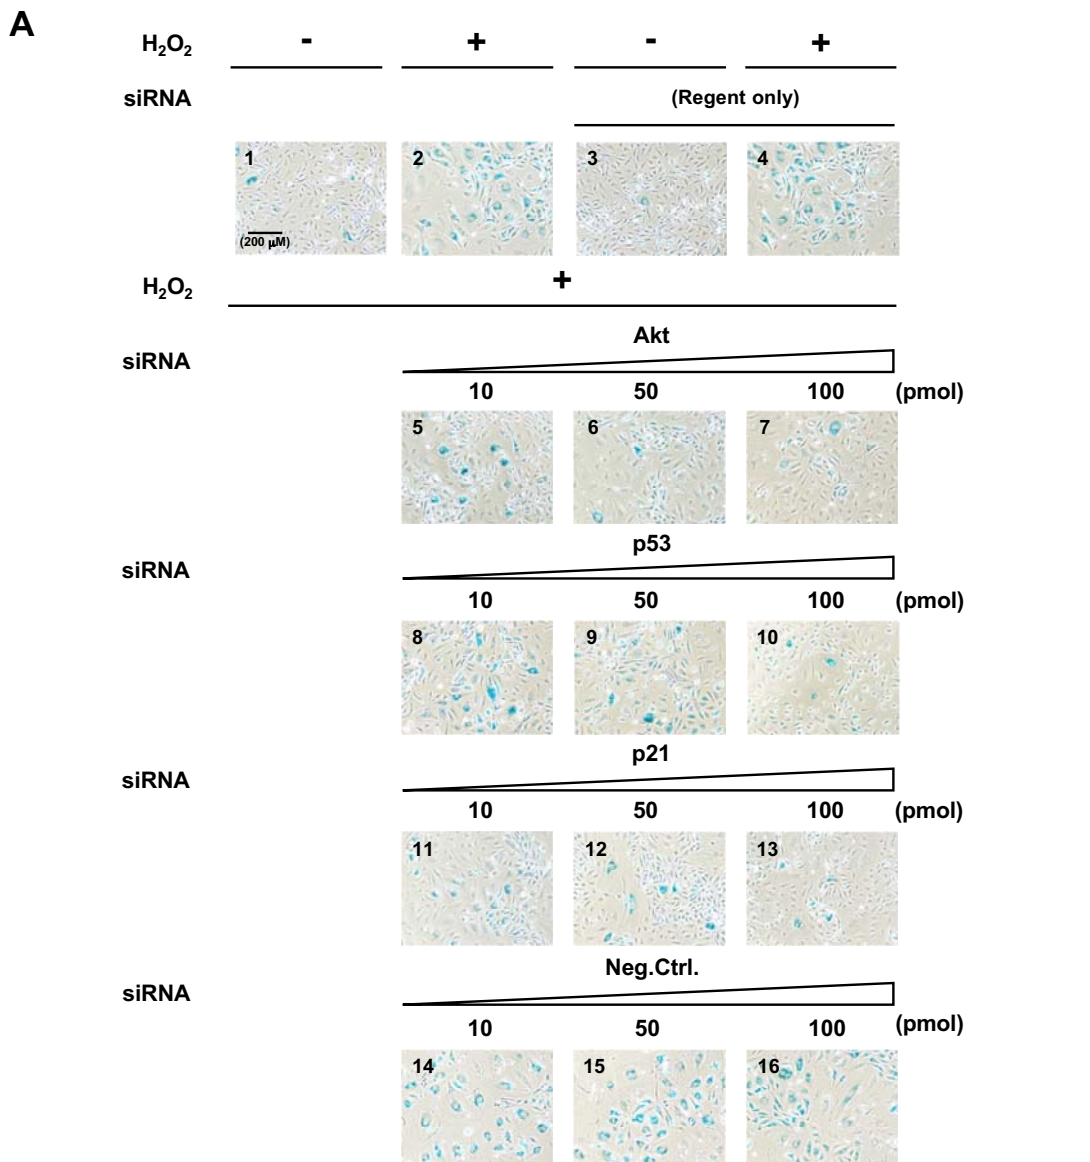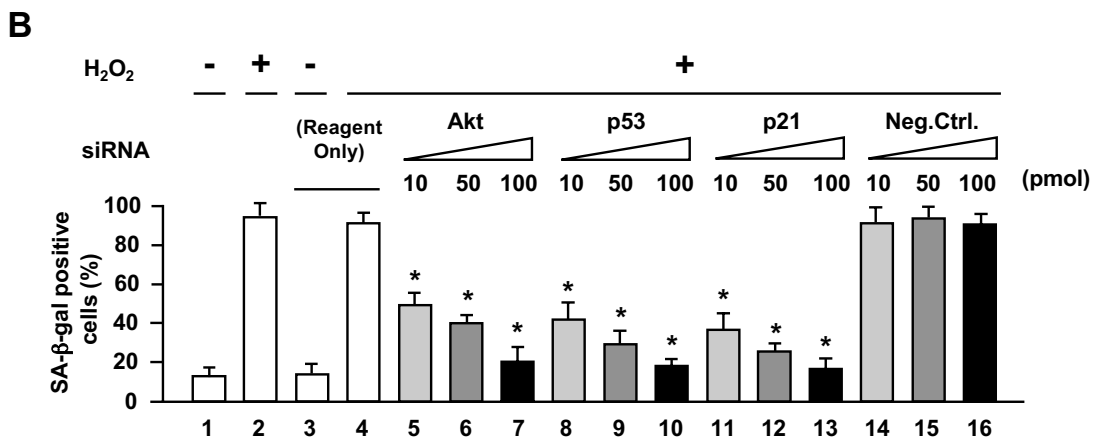



# Supplemental Fig. 6

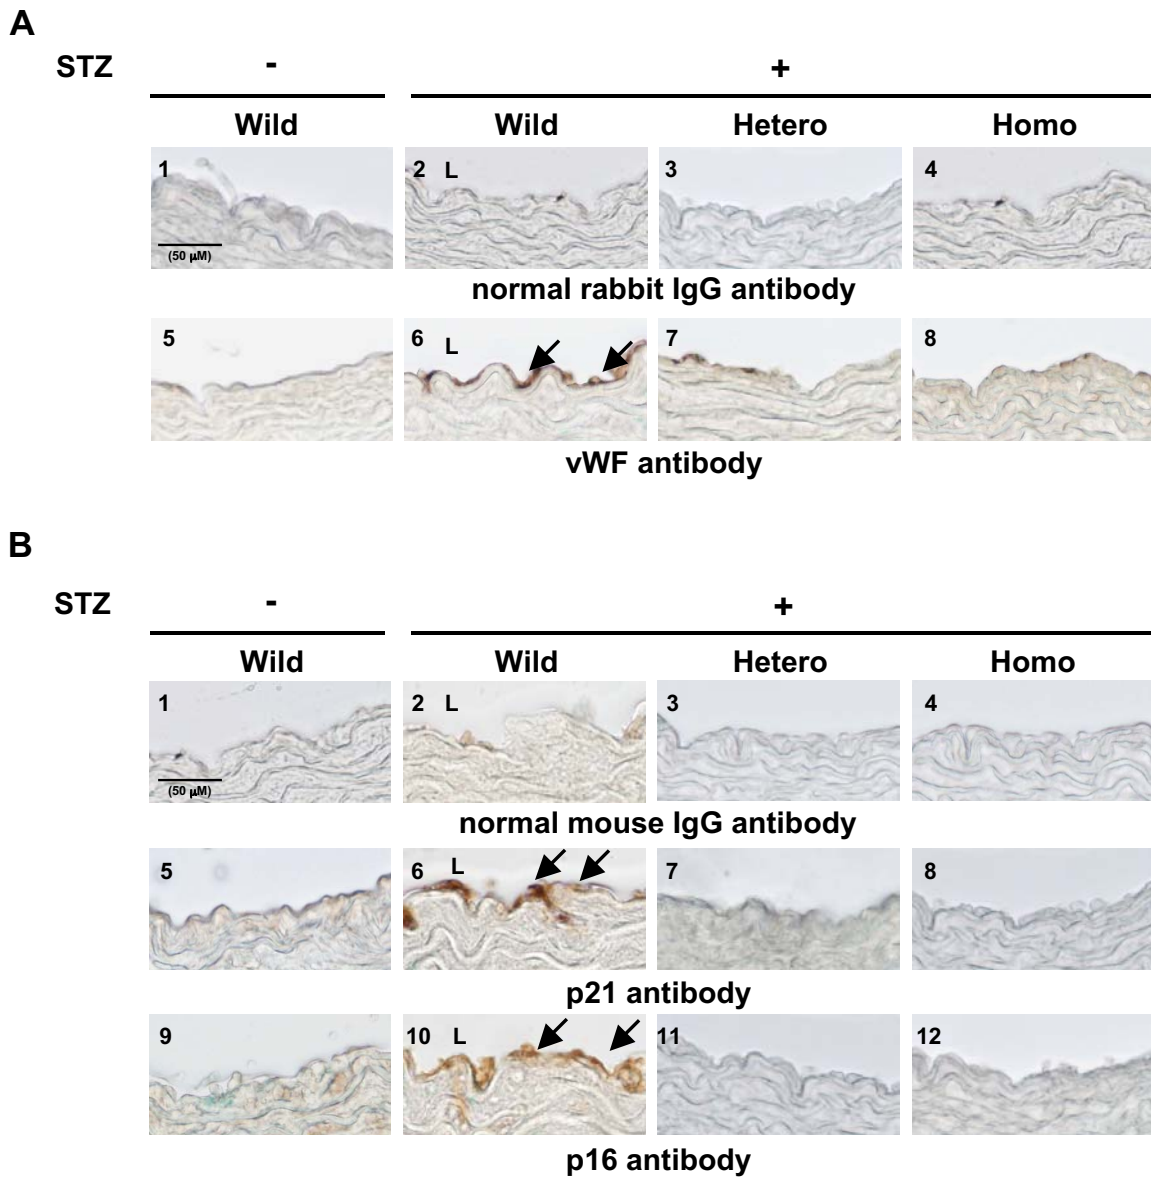

Supplemental Fig. 7

**A**

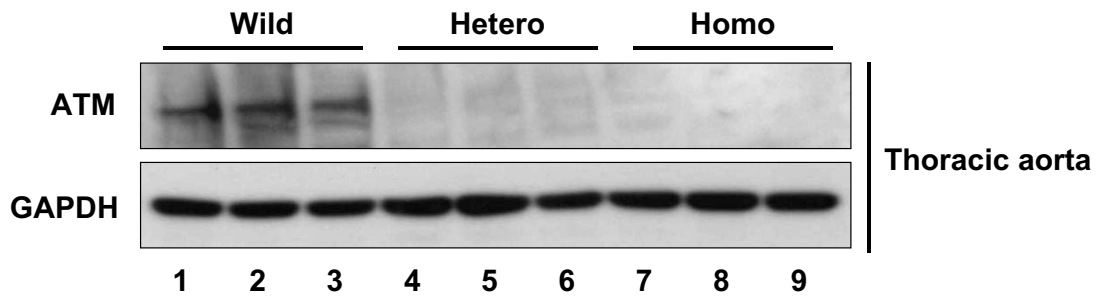

**B**

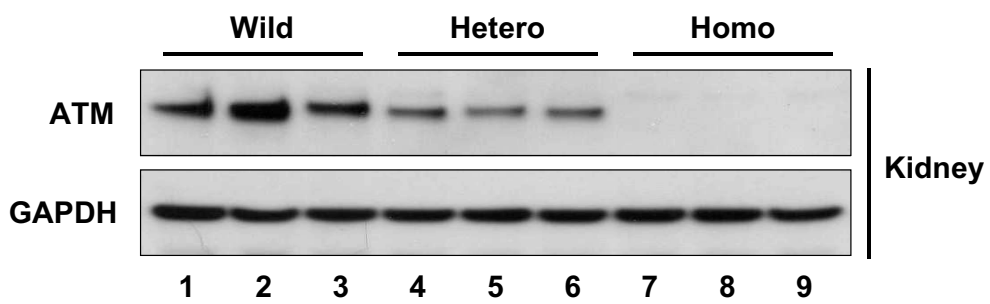

Supplement: supp_M110.125138_jbc.M110.125138-1.pdf [file supp_M110.125138_jbc.M110.125138-1.pdf]
